# Supplementary material
Source: PubMed Central journal article supplement (PMC2851779)
Supplement: 0909456107_pnas.0909456107_SI.pdf [file 0909456107_pnas.0909456107_SI.pdf]

# Supporting Information

Celik et al. 10.1073/pnas.0909456107

## SI Text

**Raman Spectroscopy. Experimental procedure.** The temperature controlled cell was observed with a WiTec Raman/near-field scanning optical microscope (WiTec Instruments Corp.) with an illumination line of 532 nm. A Nikon Air 50× (NA 0.55, long working distance) objective was used to collect Raman spectra of the ice and solution phases. The laser intensity was adjusted to 5 mW. The 5  $\mu\text{l}$  sample was sandwiched between two cover glasses and placed on a temperature controlled metal plate. The sample was frozen by cooling the stage to  $-18^\circ\text{C}$ , then melted back to form individual ice crystals. The sample was heated slowly at a rate of not more than  $0.01^\circ\text{C/s}$ , and the temperature was held constant at each stage of data collection. Raman spectra of ice below the melting point and ice in the superheated state were collected. Raman images were obtained by scanning an area and summing over it the ice OH stretching peak of the spectrum; see details in ref. 1. It took 4 min to collect a Raman intensity map of an area of  $30\ \mu\text{m} \times 30\ \mu\text{m}$ . For a full Raman spectrum from a single point, acquisition time was set to 1 min. In addition, bright light microscopy connected to a video camera was used and images were captured with a frame rate of 25 frames/s, which enabled us to measure melting velocities of superheated ice crystals.

**Results.** The series of images in Fig. S3A show an ice crystal formed in  $72\ \mu\text{M}$  *Marinomonas primoryensis* antifreeze protein (*MpAFP*) solution at different superheating temperatures. This crystal was incubated for 45 min at  $0.05^\circ\text{C}$  below its  $T_m$  after

which the temperature was slowly increased and images and single spectra were taken at different temperatures. The series of images in Fig. S3B show the Raman intensity map of a  $30\ \mu\text{m} \times 30\ \mu\text{m}$  section of the ice crystal before and after it was superheated. The melting of this particular crystal occurred at superheating of  $0.37^\circ\text{C}$ , and the melting velocity of the ice front at the actual melting temperature ( $T_{ms}$ ) was  $106\ \mu\text{m/s}$ . Raman spectra of ice were collected from the center of the crystal at different temperatures to observe whether there were any spectral changes prior to it going through its phase transition (Fig. S4). The spectrum of the crystal, with a local maximum around  $640\ \text{nm}$ , was virtually unchanged upon superheating, clearly indicating that the crystal is indeed superheated and still has an ice Ih structure. The transition in the spectrum from the ice phase to the melt phase was confirmed with repeated experiments ( $n > 10$ ). Furthermore, the spectrum obtained just after the crystal melted (Fig. S4, purple line) was indistinguishable from the spectrum of the supercooled solution close to the crystal (Fig. S4, black line). The Raman spectra of the ice observed in these experiments are consistent with those obtained by others for ice Ih; see details in ref. 2).

To conclude, Raman spectroscopy experiments of ice in a supercooled solution and ice in superheated state show no difference in the spectra. The Raman signature of ice remained constant over the temperature changes until it melted. The spectrum of water is clearly different from that of ice. Thus we show that the ice maintains its integrity at superheated temperatures.

1.. Richardson HH, et al. (2006) Thermo-optical properties of gold nanoparticles embedded in ice: Characterization of heat generation and melting. *Nano Lett* 6(4):783–788.

2.. Andreeva NP, Bunkin AF, Pershin SM (2002) Deformation of the Raman scattering spectrum of Ih ice under local laser heating near  $0^\circ\text{C}$ . *Opt Spectrosc (Transl of Opt Spektrosk)* 93(2):252–256.

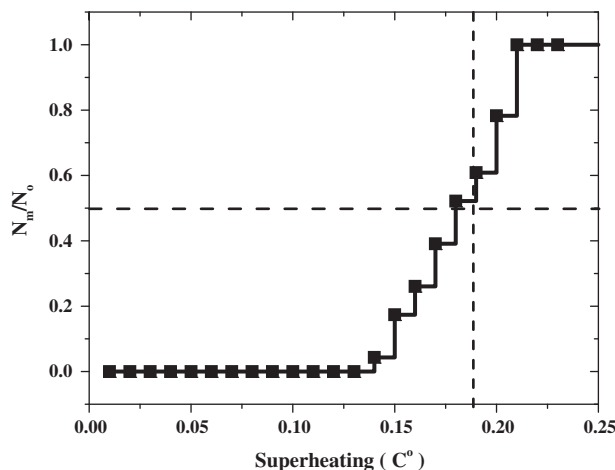

**Fig. S1.** Statistical analysis of melting as a function of superheating. A group of ice crystals ( $N_0 = 23$ ) grown in *MpAFP* solution are observed for their melting behavior at different superheating temperatures. The plot shows the ratio of the number of crystals that were melted ( $N_m$ ) relative to the initial number of crystals ( $N_0$ ) as a function of superheating ( $T - T_m$ ). Half of the crystals melted when the sample was already  $0.18^\circ\text{C}$  superheated.









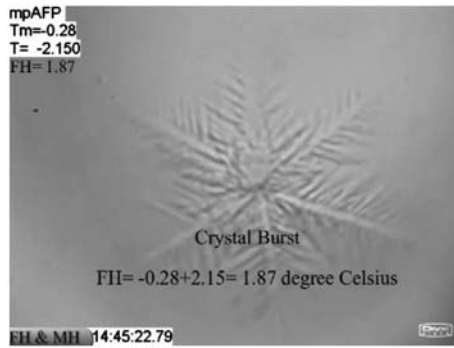

**Movie S2.** FH and MH experiment in a drop of *MpAFP* solution. A movie of the experiment described in Fig. 1.  
[Movie S2 \(WMV\)](#)

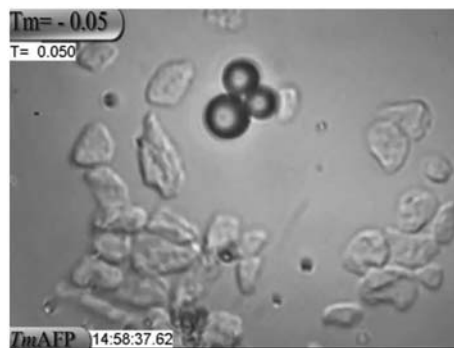

**Movie S3.** Melting experiment on a group of ice crystals. Ice crystals a solution containing the hyperactive AFP from *Tenebrio molitor* were examined in terms of their melting behavior in the same droplet while the temperature was slowly increased. The movie emphasizes the fast melting rates of the ice crystals above the  $T_m$  ( $= -0.05$  °C). The last ice crystal melts at  $0.18$  °C above the  $T_m$ . The temperature of the sample is noted (*Upper Left*), and the real time during measurement is presented (*Lower Left*).

[Movie S3 \(WMV\)](#)
